# Supplementary material
Source: PubMed Central journal article supplement (PMC4474376)
Supplement: NIHMS617279-supplement-Supplement_Data.pdf [file NIHMS617279-supplement-Supplement_Data.pdf]

## Supplementary Table 1

### Trabecular Structural Analysis of Axial Skeleton

#### $\mu$ CT Analysis of L5 Vertebral Body (Axial Skeleton)

|                                              | 5 Weeks      |                          | 10 Weeks    |                           | 20 Weeks     |                           |
|----------------------------------------------|--------------|--------------------------|-------------|---------------------------|--------------|---------------------------|
|                                              | WT(N=4)      | PLG <sup>-/-</sup> (N=4) | WT(N=4)     | PLG <sup>-/-</sup> (N=10) | WT(N=6)      | PLG <sup>-/-</sup> (N=13) |
| <b>Bone Fractional Volume (%)</b>            | 0.14±0.02    | 0.12±0.03                | 0.183±0.002 | 180.0±0.035               | 0.15±0.03    | 0.09±0.03**               |
| <b>Connective Density (1/mm<sup>3</sup>)</b> | 402.50±58.78 | 363.40±96.30             | 262.20±8.79 | 285.60±46.89              | 158.70±18.65 | 190.8±74.01               |
| <b>Trabecular Number (1/mm)</b>              | 5.28±0.27    | 5.47±0.41                | 4.92±0.04   | 4.94±0.52                 | 3.78±0.25    | 3.76±0.47                 |
| <b>Trabecular Thickness (mm)</b>             | 0.035±0.002  | 0.030±0.002              | 0.041±0.001 | 0.041±0.004               | 0.044±0.004  | 0.031±0.003**             |
| <b>Trabecular Spacing (mm)</b>               | 0.188±0.009  | 0.184±0.014              | 0.204±0.004 | 0.204±0.024               | 0.27±0.02    | 0.27±0.034                |

### Trabecular Structural Analysis of Appendicular Skeleton

#### $\mu$ CT Analysis of Distal Femoral Metaphysis (Appendicular Skeleton)

|                                              | 5 Weeks       |                          | 10 Weeks    |                          | 20 Weeks    |                           |
|----------------------------------------------|---------------|--------------------------|-------------|--------------------------|-------------|---------------------------|
|                                              | WT(N=4)       | PLG <sup>-/-</sup> (N=6) | WT(N=4)     | PLG <sup>-/-</sup> (N=8) | WT(N=5)     | PLG <sup>-/-</sup> (N=16) |
| <b>Bone Fractional Volume (%)</b>            | 0.12±0.05     | 0.09±0.03                | 0.06±0.02   | 0.07±0.03                | 0.04±0.01   | 0.02±0.01                 |
| <b>Connective Density (1/mm<sup>3</sup>)</b> | 187.80±114.00 | 172.10±95.48             | 68.34±38.11 | 79.60±53.17              | 34.94±18.22 | 12.44±14.07               |
| <b>Trabecular Number (1/mm)</b>              | 4.73±1.03     | 4.02±0.76                | 3.99±0.70   | 3.93±0.71                | 3.19±0.28   | 2.61±0.53                 |
| <b>Trabecular Thickness (mm)</b>             | 0.042±0.005   | 0.036±0.002              | 0.036±0.001 | 0.038±0.004              | 0.037±0.001 | 0.030±0.004*              |
| <b>Trabecular Spacing (mm)</b>               | 0.22±0.05     | 0.26±0.05                | 0.26±0.05   | 0.26±0.05                | 0.32±0.03   | 0.4±0.09                  |
|                                              |               |                          |             |                          | * p<0.01    | ** p<0.001                |

### Cortical Structural and Biomechanical Analysis of Appendicular Skeleton

#### $\mu$ CT/Biomechanical Analysis of Mid-Shaft Diaphyseal Femur

|                                              | 5 Weeks      |                          | 10 Weeks    |                           | 20 Weeks      |                           |
|----------------------------------------------|--------------|--------------------------|-------------|---------------------------|---------------|---------------------------|
|                                              | WT(N=6)      | PLG <sup>-/-</sup> (N=4) | WT(N=10)    | PLG <sup>-/-</sup> (N=10) | WT(N=6)       | PLG <sup>-/-</sup> (N=14) |
| <b>Marrow Volume (mm<sup>3</sup>)</b>        | 0.16±0.11    | 1.20±0.06                | 1.21±0.13   | 1.21±0.16                 | 1.05±0.09     | 1.21±0.09                 |
| <b>Cortical Thickness (mm)</b>               | 0.10±0.01    | 0.09±0.01                | 0.16±0.01   | 0.14±0.03                 | 0.19±0.01     | 0.13±0.02***              |
| <b>Intracortical Porosity (%)</b>            | 7.83±1.89    | 7.64±2.42                | 3.54±0.87   | 3.95±1.73                 | 3.28±0.24     | 4.30±0.55                 |
| <b>Moment of Inertia (mm<sup>4</sup>)</b>    | 0.054±0.004  | 0.048±0.007              | 0.100±0.022 | 0.084±0.027               | 0.108±0.007   | 0.082±0.015               |
| <b>Cross-Sectional Area (mm<sup>2</sup>)</b> | 0.38±0.03    | 0.34±0.05                | 0.69±0.09   | 0.56±0.14                 | 0.77±0.04     | 0.53±0.09***              |
| <b>Stiffness (N/mm)</b>                      | 31.08±9.71   | 29.12±6.02               | 87.63±18.93 | 56.77±26.16               | 112.90±13.47* | 63.12±16.69***            |
| <b>Peak Force (N)</b>                        | 7.61±1.40    | 6.63±1.64                | 15.75±2.15  | 10.50±4.21                | 17.11±1.53*   | 10.98±2.56***             |
| <b>Modulus (GPa)</b>                         | 6.15±1.22    | 6.5±2.05                 | 9.67±1.02   | 7.5±2.01                  | 11.04±1.296   | 7.04±1.54**               |
| <b>Bending Strength (MPa)</b>                | 156.20±19.23 | 161.0±26.94              | 174.4±14.26 | 175.9±45.45               | 199.10±17.52  | 153.8±40.96**             |
|                                              |              |                          |             | * p<0.05                  | ** p<0.01     | *** p<0.001               |

## Supplementary Table 2

### Trabecular Structural Analysis of Axial Skeleton

#### $\mu$ CT Analysis of the L5 Vertebra

|                                   | WT (N=10)   | PLG <sup>-/-</sup> (N=17) | PLG <sup>-/-</sup> FIB <sup>-/-</sup> (N=4) | PLG <sup>-/-</sup> Fiby <sup>390-396</sup> <sup>-/-</sup> (N=5) |
|-----------------------------------|-------------|---------------------------|---------------------------------------------|-----------------------------------------------------------------|
| <b>Bone Fractional Volume (%)</b> | 0.14±0.02   | 0.07±0.01 <sup>**</sup>   | 0.19±0.02                                   | 0.11±0.02                                                       |
| <b>Trabecular Number (1/mm)</b>   | 3.46±0.48   | 3.98±0.58                 | 4.49±0.32                                   | 3.75±0.94                                                       |
| <b>Trabecular Thickness (mm)</b>  | 0.087±0.001 | 0.036±0.006 <sup>**</sup> | 0.044±0.002                                 | 0.07±0.136                                                      |
| <b>Trabecular Spacing(mm)</b>     | 0.31±0.07   | 0.26±0.04                 | 0.22±0.02                                   | 0.29±0.08                                                       |

Compared to WT and PLG<sup>-/-</sup> FIB<sup>-/-</sup> \* P<0.05 \*\* P<0.001

### Cortical Structural and Biomechanical Analysis of Appendicular Skeleton

#### Biomechanical Analysis of the Midshaft Diaphyseal Femur (20 Weeks)

|                                              | WT (N=6)     | PLG <sup>-/-</sup> (N=14) | PLG <sup>-/-</sup> FIB <sup>-/-</sup> (N=5) | PLG <sup>-/-</sup> Fiby <sup>390-396</sup> <sup>-/-</sup> (N=5) |
|----------------------------------------------|--------------|---------------------------|---------------------------------------------|-----------------------------------------------------------------|
| <b>Cortical thickness (mm)</b>               | 0.19±0.01    | 0.13±0.02 <sup>**</sup>   | 0.18±0.01                                   | 0.15±0.03                                                       |
| <b>Intracortical porosity (%)</b>            | 3.28±0.24    | 4.30±0.55                 | 3.45±0.21                                   | 2.24±0.36                                                       |
| <b>Moment of inertia (mm<sup>4</sup>)</b>    | 0.108±0.007  | 0.082±0.015               | 0.116±0.008                                 | 0.10±0.18                                                       |
| <b>Cross-sectional area (mm<sup>2</sup>)</b> | 0.77±0.04    | 0.53±0.09 <sup>**</sup>   | 0.75±0.03                                   | 0.64±0.13                                                       |
| <b>Stiffness (N/mm)</b>                      | 112.90±13.47 | 63.12±16.69 <sup>**</sup> | 110.4±10.6                                  | 89.56±30.41                                                     |
| <b>Peak force (N)</b>                        | 17.11±1.53   | 10.98±2.56 <sup>**</sup>  | 18.12±1.60                                  | 13.72±2.64                                                      |
| <b>Modulus (GPa)</b>                         | 11.04±1.30   | 7.035±1.535 <sup>**</sup> | 10.18±0.37                                  | 8.98±2.31                                                       |
| <b>Bending Strength (Mpa)</b>                | 199.10±17.52 | 153.80±40.96 <sup>*</sup> | 198.8±11.99                                 | 165.8±18.60                                                     |

Compared to WT and PLG<sup>-/-</sup> FIB<sup>-/-</sup> \* P<0.05 \*\* P<0.001
